# Supplementary material
Source: publisher figshare collection journal article supplement (https://tandf.figshare.com/articles/dataset/_/5787525)
Supplement: Supplementary file 47 [file 2]

# Appendix for “Information-Based Optimal Subdata Selection for Big Data Linear Regression”

HaiYing Wang, Min Yang, and John Stufken

## A Proofs and Technical Details

### A.1 Proof of Theorem 1

We will use the following convexity result (cf. Nordström, 2011) in the proof of Theorem 1.

**Lemma 1.** *For any positive definite matrices  $\mathbf{B}_1$  and  $\mathbf{B}_2$  of the same dimension,*

$$\{\alpha\mathbf{B}_1 + (1 - \alpha)\mathbf{B}_2\}^{-1} \leq \alpha\mathbf{B}_1^{-1} + (1 - \alpha)\mathbf{B}_2^{-1} \quad (1)$$

*in the Loewner ordering, where  $0 \leq \alpha \leq 1$ .*

**Proof of Theorem 1.** The unbiasedness can be verified by direct calculation,

$$\mathbb{E}\{\tilde{\boldsymbol{\beta}}_L | \mathbf{Z}, I_{\Delta}(\boldsymbol{\eta}_L) = 1\} = \mathbb{E}_{\boldsymbol{\eta}_L}[\mathbb{E}_{\mathbf{y}}\{\tilde{\boldsymbol{\beta}}_L | \mathbf{Z}, I_{\Delta}(\boldsymbol{\eta}_L) = 1\}] = \mathbb{E}_{\boldsymbol{\eta}_L}(\boldsymbol{\beta}) = \boldsymbol{\beta}.$$

Let  $\mathbf{W} = \text{diag}(w_1\eta_{L1}, \dots, w_n\eta_{Ln})$ . The variance-covariance matrix of the sampling-based estimators can be written as

$$\begin{aligned} V\{\tilde{\boldsymbol{\beta}}_L | \mathbf{Z}, I_{\Delta}(\boldsymbol{\eta}_L) = 1\} &= \mathbb{E}_{\boldsymbol{\eta}_L}[V_{\mathbf{y}}\{\tilde{\boldsymbol{\beta}}_L | \mathbf{Z}, I_{\Delta}(\boldsymbol{\eta}_L) = 1\}] + V_{\boldsymbol{\eta}_L}[\mathbb{E}_{\mathbf{y}}\{\tilde{\boldsymbol{\beta}}_L | \mathbf{Z}, I_{\Delta}(\boldsymbol{\eta}_L) = 1\}] \\ &= \sigma^2 \mathbb{E}_{\boldsymbol{\eta}_L} \left\{ (\mathbf{X}^T \mathbf{W} \mathbf{X})^{-1} (\mathbf{X}^T \mathbf{W}^2 \mathbf{X}) (\mathbf{X}^T \mathbf{W} \mathbf{X})^{-1} \right\} + V_{\boldsymbol{\eta}_L}(\boldsymbol{\beta}) \\ &= \sigma^2 \mathbb{E}_{\boldsymbol{\eta}_L} \left[ \left\{ (\mathbf{X}^T \mathbf{W} \mathbf{X}) (\mathbf{X}^T \mathbf{W}^2 \mathbf{X})^{-1} (\mathbf{X}^T \mathbf{W} \mathbf{X}) \right\}^{-1} \right] \\ &\geq \sigma^2 \left[ \mathbb{E}_{\boldsymbol{\eta}_L} \left\{ (\mathbf{X}^T \mathbf{W} \mathbf{X}) (\mathbf{X}^T \mathbf{W}^2 \mathbf{X})^{-1} (\mathbf{X}^T \mathbf{W} \mathbf{X}) \right\} \right]^{-1}. \end{aligned} \quad (2)$$

The last inequality is due to Lemma 1. Notice that  $\mathbf{W}\mathbf{X}(\mathbf{X}^T\mathbf{W}^2\mathbf{X})^{-1}\mathbf{X}^T\mathbf{W} = \text{pr}(\mathbf{W}\mathbf{X})$ , the orthogonal projection matrix onto the column space of  $\mathbf{W}\mathbf{X}$ . Define

$$\mathbf{B}_{WX} = \begin{bmatrix} w_1\eta_{L1}\mathbf{x}_1^T & & \\ & \ddots & \\ & & w_n\eta_{Ln}\mathbf{x}_n^T \end{bmatrix}.$$

Notice that the column-space of  $\mathbf{W}\mathbf{X} = (w_1\eta_{L1}\mathbf{x}_1, \dots, w_n\eta_{Ln}\mathbf{x}_n)^T$  is contained in the column-space of  $\mathbf{B}_{WX}$ . Hence we have  $\text{pr}(\mathbf{W}\mathbf{X}) \leq \text{pr}(\mathbf{B}_{WX})$  in the Loewner ordering, i.e.,

$$\mathbf{W}\mathbf{X}(\mathbf{X}^T\mathbf{W}^2\mathbf{X})^{-1}\mathbf{X}^T\mathbf{W} \leq \begin{bmatrix} \mathbf{x}_1^T(\mathbf{x}_1\mathbf{x}_1^T)^{-}\mathbf{x}_1 I(\eta_{L1} > 0) & & \\ & \ddots & \\ & & \mathbf{x}_n^T(\mathbf{x}_n\mathbf{x}_n^T)^{-}\mathbf{x}_n I(\eta_{Ln} > 0) \end{bmatrix}.$$

where  $I()$  is the indicator function. From this result, it can be shown that

$$\mathbf{X}^T\mathbf{W}\mathbf{X}(\mathbf{X}^T\mathbf{W}^2\mathbf{X})^{-1}\mathbf{X}^T\mathbf{W}\mathbf{X} \leq \sum_{i=1}^n \mathbf{x}_i\mathbf{x}_i^T I(\eta_{Li} > 0). \quad (3)$$

For sampling with replacement,

$$P(\eta_{Li} > 0|\mathbf{Z}) = 1 - (1 - \pi_i)^k = \pi_i \sum_{i=1}^k (1 - \pi_i)^{i-1} \leq k\pi_i.$$

For sampling without replacement,

$$P(\eta_{Li} > 0|\mathbf{Z}) = P(\eta_{Li} = 1|\mathbf{Z}) = k\pi_i.$$

Thus, in either case,  $P(\eta_{Li} > 0|\mathbf{Z}) \leq k\pi_i$ . Therefore,

$$\begin{aligned} P\{\eta_{Li} > 0|\mathbf{Z}, I_{\Delta}(\boldsymbol{\eta}_L) = 1\} &= \frac{P\{\eta_{Li} > 0, I_{\Delta}(\boldsymbol{\eta}_L) = 1|\mathbf{Z}\}}{P\{I_{\Delta}(\boldsymbol{\eta}_L) = 1|\mathbf{Z}\}} \\ &\leq \frac{P(\eta_{Li} > 0|\mathbf{Z})}{P\{I_{\Delta}(\boldsymbol{\eta}_L) = 1|\mathbf{Z}\}} \leq \frac{k\pi_i}{P\{I_{\Delta}(\boldsymbol{\eta}_L) = 1|\mathbf{Z}\}}. \end{aligned} \quad (4)$$

Combining (2), (3) and (4), we have

$$\begin{aligned} V\{\tilde{\boldsymbol{\beta}}_L|\mathbf{Z}, I_{\Delta}(\boldsymbol{\eta}_L) = 1\} &\geq \sigma^2 \left[ E_{\boldsymbol{\eta}_L} \left\{ \sum_{i=1}^n \mathbf{x}_i\mathbf{x}_i^T I(\eta_{Li} > 0) \right\} \right]^{-1} \\ &= \sigma^2 \left[ \sum_{i=1}^n \mathbf{x}_i\mathbf{x}_i^T P\{\eta_{Li} > 0|\mathbf{Z}, I_{\Delta}(\boldsymbol{\eta}_L) = 1\} \right]^{-1} \\ &\geq \frac{\sigma^2 P\{I_{\Delta}(\boldsymbol{\eta}_L) = 1|\mathbf{Z}\}}{k} \left\{ \sum_{i=1}^n \pi_i \mathbf{x}_i\mathbf{x}_i^T \right\}^{-1}. \end{aligned}$$

□

## A.2 Proof of Theorem 2

*Proof.* Let  $\check{z}_{ij} = \{2z_{ij} - (z_{(n)j} + z_{(1)j})\}/(z_{(n)j} - z_{(1)j})$ . Then we have,

$$\sum_{i=1}^n \delta_i \mathbf{x}_i \mathbf{x}_i^T = k \mathbf{B}_3^{-1} \check{\mathbf{M}}(\boldsymbol{\delta}) (\mathbf{B}_3^T)^{-1}, \quad (5)$$

where

$$\check{\mathbf{M}}(\boldsymbol{\delta}) = \begin{bmatrix} 1 & k^{-1} \sum_{i=1}^n \delta_i \check{z}_{i1} & \dots & k^{-1} \sum_{i=1}^n \delta_i \check{z}_{id} \\ k^{-1} \sum_{i=1}^n \delta_i \check{z}_{i1} & k^{-1} \sum_{i=1}^n \delta_i \check{z}_{i1}^2 & \dots & k^{-1} \sum_{i=1}^n \delta_i \check{z}_{i1} \check{z}_{ip} \\ \vdots & \vdots & \ddots & \vdots \\ k^{-1} \sum_{i=1}^n \delta_i \check{z}_{ip} & k^{-1} \sum_{i=1}^n \delta_i \check{z}_{i1} \check{z}_{ip} & \dots & k^{-1} \sum_{i=1}^n \delta_i \check{z}_{ip}^2 \end{bmatrix},$$

and

$$\mathbf{B}_3 = \begin{bmatrix} 1 & & & \\ -\frac{z_{(n)1} + z_{(1)1}}{z_{(n)1} - z_{(1)1}} & \frac{2}{z_{(n)1} - z_{(1)1}} & & \\ \vdots & & \ddots & \\ -\frac{z_{(n)p} + z_{(1)p}}{z_{(n)p} - z_{(1)p}} & & & \frac{2}{z_{(n)p} - z_{(1)p}} \end{bmatrix} \quad (6)$$

Note that  $\check{z}_{ij} \in [-1, 1]$  for all  $i = 1, \dots, n$  and  $j = 1, \dots, p$ , which implies  $k^{-1} \sum_{i=1}^n \delta_i \check{z}_{ij}^2 \leq 1$  for all  $1 \leq j \leq p$ . Thus,

$$|\check{\mathbf{M}}(\boldsymbol{\delta})| = \prod_{j=0}^p \lambda_j \leq \left( \frac{\sum_{j=0}^p \lambda_j}{p+1} \right)^{p+1} = \left( \frac{1 + \sum_{j=1}^p k^{-1} \sum_{i=1}^n \delta_i \check{z}_{ij}^2}{p+1} \right)^{p+1} \leq 1, \quad (7)$$

where  $\lambda_j$ ,  $j = 0, 1, \dots, p$  are eigenvalues of  $\check{\mathbf{M}}(\boldsymbol{\delta})$ . From (5), (6) and (7),

$$\left| \sum_{i=1}^n \delta_i \mathbf{x}_i \mathbf{x}_i^T \right| = k^{p+1} |\mathbf{B}_3|^{-2} |\check{\mathbf{M}}(\boldsymbol{\delta})| \leq k^{p+1} \left| \prod_{j=1}^p \frac{2}{z_{(n)j} - z_{(1)j}} \right|^{-2} = \frac{k^{p+1}}{4^p} \prod_{j=1}^p (z_{(n)j} - z_{(1)j})^2.$$

If the subdata consists of the  $2^p$  points  $(a_1, \dots, a_p)^T$  where  $a_j = z_{(n)j}$  or  $z_{(1)j}$ ,  $j = 1, 2, \dots, p$ , each occurring equally often, then the  $\boldsymbol{\delta}^{opt}$  corresponding to this subdata satisfies  $\check{\mathbf{M}}(\boldsymbol{\delta}) = \mathbf{I}$ . This  $\boldsymbol{\delta}^{opt}$  attains equality in (7) and corresponds therefore to D-optimal subdata.  $\square$

## A.3 Proof of Theorem 3

*Proof.* As before, for  $i = 1, \dots, n$ ,  $j = 1, \dots, p$ , let  $z_{(i)j}$  be the  $i$ th order statistic for  $z_{1j}, \dots, z_{nj}$ . For  $l \neq j$ , let  $z_j^{(i)l}$  be the concomitant of  $z_{(i)l}$  for  $z_j$ , i.e., if  $z_{(i)l} = z_{sl}$  then  $z_j^{(i)l} = z_{sj}$ ,

$i = 1, \dots, n$ . For the subdata obtained from Algorithm 1, let  $\bar{z}_j^*$  and  $\text{var}(z_j^*)$  be the sample mean and sample variance for covariate  $z_j$ . From Algorithm 1, the values  $z_j$ ,  $j = 1, \dots, p$ , in the subdata consist of  $z_{(m)j}$ , and  $z_j^{(m)l}$ ,  $l = 1, \dots, j-1, j+1, \dots, p$ ,  $m = 1, \dots, r, n-r+1, \dots, n$ . Note that the subdata may not contain exactly the  $r$  smallest and  $r$  largest values for each covariate since some data points may be removed in processing each covariate. However, since  $r$  is fixed when  $n$  goes to infinity, this will not affect the final result. Therefore, for easy of presentation, we abuse the notation and write the range of values of  $m$  as  $1, \dots, r, n-r+1, \dots, n$ . The information matrix based on the subdata can be written as

$$(\mathbf{X}_D^*)^T \mathbf{X}_D^* = \mathbf{B}_4^{-1} \begin{bmatrix} k & \mathbf{0}^T \\ \mathbf{0} & (k-1)\mathbf{R} \end{bmatrix} (\mathbf{B}_4^T)^{-1}, \quad (8)$$

where

$$\mathbf{B}_4 = \begin{bmatrix} 1 & & & \\ -\frac{\bar{z}_1^*}{\sqrt{\text{var}(z_1^*)}} & \frac{1}{\sqrt{\text{var}(z_1^*)}} & & \\ \vdots & & \ddots & \\ -\frac{\bar{z}_p^*}{\sqrt{\text{var}(z_p^*)}} & & & \frac{1}{\sqrt{\text{var}(z_p^*)}} \end{bmatrix}. \quad (9)$$

From (8) and (9),

$$|(\mathbf{X}_D^*)^T \mathbf{X}_D^*| = k|(k-1)\mathbf{R}| \prod_{j=1}^p \text{var}(z_j^*) \geq k(k-1)^p \lambda_{\min}^p(\mathbf{R}) \prod_{j=1}^p \text{var}(z_j^*). \quad (10)$$

For each sample variance,

$$\begin{aligned} (k-1)\text{var}(z_j^*) &= \sum_{i=1}^k (z_{ij}^* - \bar{z}_j^*)^2 \\ &= \left( \sum_{i=1}^r + \sum_{i=n-r+1}^n \right) (z_{(i)j} - \bar{z}_j^*)^2 + \sum_{l \neq j} \left( \sum_{i=1}^r + \sum_{i=n-r+1}^n \right) (z_j^{(i)l} - \bar{z}_j^*)^2 \\ &\geq \left( \sum_{i=1}^r + \sum_{i=n-r+1}^n \right) (z_{(i)j} - \bar{z}_j^{**})^2 \\ &= \sum_{i=1}^r (z_{(i)j} - \bar{z}_j^{*l})^2 + \sum_{i=n-r+1}^n (z_{(i)j} - \bar{z}_j^{*u})^2 + \frac{r}{2} (\bar{z}_j^{*u} - \bar{z}_j^{*l})^2 \\ &\geq \frac{r}{2} (\bar{z}_j^{*u} - \bar{z}_j^{*l})^2 \end{aligned}$$

$$\geq \frac{r}{2} (z_{(n-r+1)j} - z_{(r)j})^2 \quad (11)$$

where  $\bar{z}_j^{**} = (\sum_{i=1}^r + \sum_{i=n-r+1}^n) z_{(i)j} / (2r)$ ,  $\bar{z}_j^{*l} = \sum_{i=1}^r z_{(i)j} / r$ , and  $\bar{z}_j^{*u} = \sum_{i=n-r+1}^n z_{(i)j} / r$ . From (11),

$$\text{var}(z_j^*) \geq \frac{r(z_{(n)j} - z_{(1)j})^2}{2(k-1)} \left( \frac{z_{(n-r+1)j} - z_{(r)j}}{z_{(n)j} - z_{(1)j}} \right)^2. \quad (12)$$

Thus,

$$\begin{aligned} |(\mathbf{X}_D^*)^T \mathbf{X}_D^*| &\geq k(k-1)^p \lambda_{\min}^p(\mathbf{R}) \prod_{j=1}^p \frac{r(z_{(n)j} - z_{(1)j})^2}{2(k-1)} \left( \frac{z_{(n-r+1)j} - z_{(r)j}}{z_{(n)j} - z_{(1)j}} \right)^2 \\ &= \frac{r^p}{2^p} k \lambda_{\min}^p(\mathbf{R}) \prod_{j=1}^p (z_{(n)j} - z_{(1)j})^2 \times \prod_{j=1}^p \left( \frac{z_{(n-r+1)j} - z_{(r)j}}{z_{(n)j} - z_{(1)j}} \right)^2. \end{aligned}$$

This shows that

$$\frac{|(\mathbf{X}_D^*)^T \mathbf{X}_D^*|}{\frac{k^{p+1}}{4^p} \prod_{j=1}^p (z_{(n)j} - z_{(1)j})^2} \geq \frac{\lambda_{\min}^p(\mathbf{R})}{p^p} \times \prod_{j=1}^p \left( \frac{z_{(n-r+1)j} - z_{(r)j}}{z_{(n)j} - z_{(1)j}} \right)^2.$$

□

## A.4 Proof of Theorem 4

*Proof.* From (8) and (9),

$$V(\hat{\beta}^D | \mathbf{Z}) = \sigma^2 \{(\mathbf{X}_D^*)^T \mathbf{X}_D^*\}^{-1} = \sigma^2 \mathbf{B}_4^T \begin{bmatrix} \frac{1}{k} & \mathbf{0}^T \\ \mathbf{0} & \frac{1}{k-1} \mathbf{R}^{-1} \end{bmatrix} \mathbf{B}_4.$$

Thus

$$V(\hat{\beta}_0^D | \mathbf{Z}) = \sigma^2 \left( \frac{1}{k} + \frac{1}{k-1} \mathbf{u}^T \mathbf{R}^{-1} \mathbf{u} \right), \quad (13)$$

and

$$V(\hat{\beta}_j^D | \mathbf{Z}) = \frac{\sigma^2}{k-1} \frac{(\mathbf{R}^{-1})_{jj}}{\text{var}(z_j^*)}, \quad (14)$$

where  $\mathbf{u} = \left\{ -\bar{z}_1^* / \sqrt{\text{var}(z_1^*)}, \dots, -\bar{z}_p^* / \sqrt{\text{var}(z_p^*)} \right\}^T$  and  $(\mathbf{R}^{-1})_{jj}$  is the  $j$ th diagonal element of  $\mathbf{R}^{-1}$ .

From (13),  $V(\hat{\beta}_0^D | \mathbf{Z}) \geq \sigma^2 / k$  because  $\mathbf{u}^T \mathbf{R}^{-1} \mathbf{u} \geq 0$ .

Denote the spectral decomposition of  $\mathbf{R}$  as  $\mathbf{R} = \mathbf{V}\mathbf{\Lambda}\mathbf{V}^T$ . Since  $\mathbf{\Lambda}^{-1} \leq \lambda_{\min}^{-1}(\mathbf{R})\mathbf{I}_p$ ,  $\mathbf{R}^{-1} = \mathbf{V}\mathbf{\Lambda}^{-1}\mathbf{V}^T \leq \mathbf{V}\lambda_{\min}^{-1}(\mathbf{R})\mathbf{I}_p\mathbf{V}^T = \lambda_{\min}^{-1}(\mathbf{R})\mathbf{I}_p^T$ . Thus  $\mathbf{R}_{jj}^{-1} \leq \lambda_{\min}^{-1}(\mathbf{R})$  for all  $j$ . From this fact, and (14) and (12), we have

$$V(\hat{\beta}_j^D | \mathbf{Z}) = \frac{\sigma^2}{k-1} \frac{(\mathbf{R}^{-1})_{jj}}{\text{var}(z_j^*)} \leq \frac{4p\sigma^2}{k\lambda_{\min}(\mathbf{R})(z_{(n-r+1)j} - z_{(r)j})^2}. \quad (15)$$

Similarly, we have

$$V(\hat{\beta}_j^D | \mathbf{Z}) = \frac{\sigma^2}{k-1} \frac{(\mathbf{R}^{-1})_{jj}}{\text{var}(z_j^*)} \geq \frac{4\sigma^2}{k\lambda_{\max}(\mathbf{R})(z_{(n)j} - z_{(1)j})^2}. \quad (16)$$

Here we utilize the following inequality

$$\text{var}(z_j^*) \leq \frac{1}{k-1} \sum_{i=1}^k \left( z_{ij}^* - \frac{z_{(n)j} + z_{(1)j}}{2} \right)^2 \leq \frac{k}{4(k-1)} (z_{(n)j} - z_{(1)j})^2, \quad (17)$$

where the last inequality is due to the fact  $|z_{ij}^* - \frac{z_{(n)j} + z_{(1)j}}{2}| \leq \frac{z_{(n)j} - z_{(1)j}}{2}$  for all  $i = 1, \dots, k$ .  $\square$

## A.5 Proof of Theorem 5

*Proof.* For (21), it is a direct result from (20).

For (22), we consider the five cases in the following. For the first case that  $r$  is fixed, from results in Theorems 2.8.1 and 2.8.2 in Galambos (1987), we have that

$$\frac{z_{(n-r+1)j} - z_{(r)j}}{z_{(n)j} - z_{(1)j}} = O_P(1) \quad \text{and} \quad \frac{z_{(n)j} - z_{(1)j}}{z_{(n-r+1)j} - z_{(r)j}} = O_P(1). \quad (18)$$

Combining (21) and (18), (22) follows.

For the second case when  $r \rightarrow \infty$ ,  $r/n \rightarrow 0$ , and the support of  $F_j$  is bounded, (18) can be easily verified.

For the third case when the upper endpoint for the support of  $F_j$  is  $\infty$  and the lower endpoint for the support of  $F_j$  is finite, and  $r \rightarrow \infty$  slow enough such that (23) holds, if we can show that  $z_{(n-r+1)j}/z_{(n)j} = 1 + o_P(1)$ , then the result in (22) follows. Let  $b_{n,j} = F_j^{-1}(1 - n^{-1})$ . From Hall (1979), we only need to show that  $z_{(n-r+1)j}/b_{n,j} = 1 + o_P(1)$  in order to show that  $z_{(n-r+1)j}/z_{(n)j} = 1 + o_P(1)$ . For this, from the proof of Theorem 1 of Hall (1979), it suffices to show that

$$\left[ \frac{1 - F_j(b_{n,j})}{1 - F_j\{(1 - \epsilon)b_{n,j}\}} \right]^{-1/2} \left[ 1 - \frac{r\{1 - F_j(b_{n,j})\}}{1 - F_j\{(1 - \epsilon)b_{n,j}\}} \right] \rightarrow \infty,$$

which holds by directly applying the assumption in (23) and the fact that  $r \rightarrow \infty$ .

For the fourth case, it can be proved by using an approach similar to the one used for the third case. It can also be proved by noting that  $z_{(r)j} = -(-z)_{(n-r+1)j}$ ,  $z_{(1)j} = -(-z)_{(n)j}$ , and the fact that the condition in (24) on  $\mathbf{z}$  becomes the condition in (23) on  $-\mathbf{z}$ .

For the fifth case, it can be proved by combining the results in the third case and the fourth case.  $\square$

## A.6 Proof of Theorem 6

Let  $\sigma_j$  and  $\rho_{j_1 j_2}$  be the  $j$ th diagonal element of  $\Phi$  and entry  $(j_1, j_2)$  of  $\rho$ , respectively, for  $j, j_1, j_2 = 1, \dots, p$ . As described in the proof of Theorem 3, from Algorithm 1, the values  $z_j$ ,  $j = 1, \dots, p$ , in the subdata consist of  $z_{(i)j}$ , and  $z_j^{(i)l}$ ,  $l = 1, \dots, j-1, j+1, \dots, p$ ,  $i = 1, \dots, r$ ,  $n-r+1, \dots, n$ , where  $z_j^{(i)l}$  are the concomitants for  $z_j$ .

Let  $\mathbf{v} = (\mathbf{Z}_D^*)^T \mathbf{1}$  and  $\Omega = (\mathbf{Z}_D^*)^T \mathbf{Z}_D^*$ . Then

$$(\mathbf{X}_D^*)^T \mathbf{X}_D^* = \begin{bmatrix} k & \mathbf{v}^T \\ \mathbf{v} & \Omega \end{bmatrix}. \quad (19)$$

The  $j$ th diagonal element of  $\Omega$  is

$$\Omega_{jj} = \left( \sum_{i=1}^r + \sum_{i=n-r+1}^n \right) z_{(i)j}^2 + \sum_{l \neq j} \left( \sum_{i=1}^r + \sum_{i=n-r+1}^n \right) \left( z_j^{(i)l} \right)^2, \quad (20)$$

while entry  $(j_1, j_2)$ ,  $j_1 \neq j_2$ , is

$$\Omega_{j_1 j_2} = \left( \sum_{i=1}^r + \sum_{i=n-r+1}^n \right) \left( z_{(i)j_1} z_{j_2}^{(i)j_1} + z_{(i)j_2} z_{j_1}^{(i)j_2} \right) + \sum_{l \neq j_1 j_2} \left( \sum_{i=1}^r + \sum_{i=n-r+1}^n \right) z_{j_1}^{(i)l} z_{j_2}^{(i)l}. \quad (21)$$

The  $j$ th element of  $\mathbf{v}$  is

$$v_j = \left( \sum_{i=1}^r + \sum_{i=n-r+1}^n \right) z_{(i)j} + \sum_{l \neq j} \left( \sum_{i=1}^r + \sum_{i=n-r+1}^n \right) z_j^{(i)l}. \quad (22)$$

Now we consider the two specific distributions in Theorem 6 and prove the corresponding results in (26) and (27).

### A.6.1 Proof of equation (26) in Theorem 6

*Proof.* When  $\mathbf{z}_i \sim N(\boldsymbol{\mu}, \boldsymbol{\Sigma})$ , using the results in Example 2.8.1 of Galambos (1987), we obtain

$$\begin{aligned} z_{(i)j} &= \mu_j - \sigma_j \sqrt{2 \log n} + o_P(1), \quad i = 1, \dots, r, \\ z_{(i)j} &= \mu_j + \sigma_j \sqrt{2 \log n} + o_P(1), \quad i = n - r + 1, \dots, n. \end{aligned} \quad (23)$$

Using an approach similar to Example 5.5.1 of Galambos (1987), we obtain

$$\begin{aligned} z_j^{(i)l} &= \mu_j - \rho_{lj} \sigma_j \sqrt{2 \log n} + O_P(1), \quad i = 1, \dots, r, \\ z_j^{(i)l} &= \mu_j + \rho_{lj} \sigma_j \sqrt{2 \log n} + O_P(1), \quad i = n - r + 1, \dots, n. \end{aligned} \quad (24)$$

Using (23) and (24), from (20), (21) and (22), we obtain that

$$\Omega_{jj} = 4r \log n \sigma_j^2 \sum_{l=1}^p \rho_{lj}^2 + O_P(\sqrt{\log n}), \quad (25)$$

$$\Omega_{j_1 j_2} = 4r \log n \sigma_{j_1} \sigma_{j_2} \sum_{l=1}^p \rho_{lj_1} \rho_{lj_2} + O_P(\sqrt{\log n}) \quad (26)$$

$$v_j = O_P(1), \quad (27)$$

respectively. From (25), (26) and (27), we have

$$\boldsymbol{\Omega} = 4r \log n \boldsymbol{\Phi} \boldsymbol{\rho}^2 \boldsymbol{\Phi} + O_P(\sqrt{\log n}) \quad \text{and} \quad \mathbf{v} = O_P(1). \quad (28)$$

The variance,

$$V(\hat{\boldsymbol{\beta}}^D | \mathbf{X}) = \sigma^2 \begin{bmatrix} k & \mathbf{v}^T \\ \mathbf{v} & \boldsymbol{\Omega} \end{bmatrix}^{-1} = \frac{\sigma^2}{c} \begin{bmatrix} 1 & -\mathbf{v}^T \boldsymbol{\Omega}^{-1} \\ -\boldsymbol{\Omega}^{-1} \mathbf{v} & c \boldsymbol{\Omega}^{-1} + \boldsymbol{\Omega}^{-1} \mathbf{v} \mathbf{v}^T \boldsymbol{\Omega}^{-1} \end{bmatrix}, \quad (29)$$

where  $c = k - \mathbf{v}^T \boldsymbol{\Omega}^{-1} \mathbf{v} = k + O_P(1/\log n)$  and the second equality is from (28). Note that from (28)  $\boldsymbol{\Omega}^{-1} = O_P(1/\log n)$ , so

$$\begin{aligned} \boldsymbol{\Omega}^{-1} - (4r \log n \boldsymbol{\Phi} \boldsymbol{\rho}^2 \boldsymbol{\Phi})^{-1} &= \boldsymbol{\Omega}^{-1} (4r \log n \boldsymbol{\Phi} \boldsymbol{\rho}^2 \boldsymbol{\Phi} - \boldsymbol{\Omega}) (4r \log n \boldsymbol{\Phi} \boldsymbol{\rho}^2 \boldsymbol{\Phi})^{-1} \\ &= O_P\left(\frac{1}{\log n}\right) O_P(\sqrt{\log n}) O\left(\frac{1}{\log n}\right) = O_P\left\{\frac{1}{(\log n)^{3/2}}\right\}. \end{aligned}$$

Thus

$$\boldsymbol{\Omega}^{-1} = \frac{1}{4r \log n} (\boldsymbol{\Phi} \boldsymbol{\rho}^2 \boldsymbol{\Phi})^{-1} + O_P\left\{\frac{1}{(\log n)^{3/2}}\right\}. \quad (30)$$



Combining (19), (29) and (30), and using that  $k = 2rp$

$$V(\hat{\beta}^D | \mathbf{X}) = \sigma^2 \begin{bmatrix} \frac{1}{k} + O_P\left(\frac{1}{\log n}\right) & O_P\left(\frac{1}{\log n}\right) \\ O_P\left(\frac{1}{\log n}\right) & \frac{1}{4r \log n} (\Phi \boldsymbol{\rho}^2 \Phi)^{-1} + O_P\left\{\frac{1}{(\log n)^{3/2}}\right\} \end{bmatrix}.$$

□

### A.6.2 Proof of equation (27) in Theorem 6

*Proof.* When  $\mathbf{z}_i \sim LN(\boldsymbol{\mu}, \boldsymbol{\Sigma})$ . Let  $z_{ij} = \exp(U_{ij})$  with  $\mathbf{U}_i = (U_{i1}, \dots, U_{ip})^T \sim N(\boldsymbol{\mu}, \boldsymbol{\Sigma})$ . From (23),

$$\begin{aligned} z_{(i)j} &= \exp(U_{(i)j}) = \exp(-\sigma_j \sqrt{2 \log n}) O_P(1) = o_P(1), \quad i = 1, \dots, r, \\ z_{(i)j} &= \exp(U_{(i)j}) = \exp(\sigma_j \sqrt{2 \log n}) \{e^{\mu_j} + o_P(1)\}, \quad i = n - r + 1, \dots, n. \end{aligned} \quad (31)$$

Without loss of generality, assume that  $\rho_{lj} \geq 0$ ,  $l, j = 1, \dots, p$ . From (24),

$$\begin{aligned} z_j^{(i)l} &= \exp(U_j^{(i)l}) = \exp(-\rho_{lj} \sigma_j \sqrt{2 \log n}) O_P(1) = o_P(1), \quad i = 1, \dots, r, \\ z_j^{(i)l} &= \exp(U_j^{(i)l}) = \exp\{\sigma_j \sqrt{2 \log n} - (1 - \rho_{lj}) \sigma_j \sqrt{2 \log n} + \mu_j + O_P(1)\} \\ &= \exp(\sigma_j \sqrt{2 \log n}) o_P(1), \quad i = n - r + 1, \dots, n. \end{aligned} \quad (32)$$

Using (31) and (32), from (20), (21) and (22), we obtain that

$$\Omega_{jj} = r \exp(2\sigma_j \sqrt{2 \log n}) \{e^{2\mu_j} + o_P(1)\}, \quad (33)$$

$$\Omega_{j_1 j_2} = 2r \exp\left\{(\sigma_{j_1} + \sigma_{j_2}) \sqrt{2 \log n}\right\} o_P(1), \quad (34)$$

$$v_j = r \exp(\sigma_j \sqrt{2 \log n}) \{e^{\mu_j} + o_P(1)\}. \quad (35)$$

From (19), (33)-(35), for  $\mathbf{A}_n = \text{diag}\left\{1, \exp(\sigma_1 \sqrt{2 \log n}), \dots, \exp(\sigma_p \sqrt{2 \log n})\right\}$ ,

$$\mathbf{A}_n^{-1} (\mathbf{X}_D^*)^T \mathbf{X}_D^* \mathbf{A}_n^{-1} = \mathbf{A}_n^{-1} \begin{bmatrix} k & \mathbf{v}^T \\ \mathbf{v} & \boldsymbol{\Omega} \end{bmatrix} \mathbf{A}_n^{-1} = \begin{bmatrix} k & r \mathbf{v}_1^T \\ r \mathbf{v}_1 & r \mathbf{B}_5 \end{bmatrix} + o_P(1) \quad (36)$$

where  $\mathbf{v}_1 = (e^{\mu_1}, \dots, e^{\mu_p})^T$  and  $\mathbf{B}_5 = \text{diag}(e^{2\mu_1}, \dots, e^{2\mu_p})$ . From (36),

$$\begin{aligned} V(\mathbf{A}_n \hat{\beta}^D | \mathbf{X}) &= \sigma^2 \mathbf{A}_n \{(\mathbf{X}_D^*)^T \mathbf{X}_D^*\}^{-1} \mathbf{A}_n = \sigma^2 \begin{bmatrix} k & r \mathbf{v}_1^T \\ r \mathbf{v}_1 & r \mathbf{B}_5 \end{bmatrix}^{-1} + o_P(1) \\ &= \frac{2\sigma^2}{k} \begin{bmatrix} 1 & -\mathbf{u}^T \\ -\mathbf{u} & p\boldsymbol{\Lambda} + \mathbf{u}\mathbf{u}^T \end{bmatrix} + o_P(1). \end{aligned}$$

□

## A.7 Proof of results in Table 1

When the covariate has a  $t$  distribution, from Theorem 4, for simple linear model, the variance of the estimator of  $\beta_1$  using the D-OPT IBOSS approach is of the same order as  $(z_{(n)1} - z_{(1)1})^{-2}$ . From Theorems 2.1.2 and 2.9.2 of Galambos (1987), we obtain that  $z_{(n)1} - z_{(1)1} \asymp_P n^{1/\nu}$ . Thus, the variance is of the order  $n^{-2/\nu}$ .

For the full data approach, the variance of the estimator of  $\beta_1$  is of the same order as  $(\sum_{i=1}^n z_{i1}^2)^{-1}$ . When  $z_1$  has a  $t$  distribution with degrees of freedom  $\nu > 2$ , from Kolmogorov's strong law of large numbers (SLLN),  $\sum_{i=1}^n z_{i1}^2 = O(n)$  almost surely. If  $\nu \leq 2$ ,  $E[\{z_{i1}^2\}^{1/(2/\nu+\alpha)}] < \infty$  for any  $\alpha > 0$ . Thus, from Marcinkiewicz-Zygmund SLLN (Theorem 2 of Section 5.2 of Chow and Teicher, 2003),  $\sum_{i=1}^n z_{ij}^2 = o(n^{2/\nu+\alpha})$  almost surely for any  $\alpha > 0$ . This shows that the order of  $(\sum_{i=1}^n z_{i1}^2)^{-1}$  is slower than  $n^{-(2/\nu+\alpha)}$  for any  $\alpha > 0$ .

For the UNI approach, the lower bound for the variance of the estimator of  $\beta_1$  is of the same order as  $n(\sum_{i=1}^n z_{i1}^2)^{-1}$ , which is of order  $O(1)$  when  $\nu > 2$  and is slower than  $n^{2/\nu-1+\alpha}$  for any  $\alpha > 0$  when  $\nu \leq 2$ .

For the intercept  $\beta_0$ , the variance of the estimator is of the same order as the inverse of the sample size used in each method.

## References

- Chow, Y. S. C. and Teicher, H. (2003). *Probability Theory: Independence, Interchangeability, Martingales*. Springer, New York.
- Galambos, J. (1987). *The asymptotic theory of extreme order statistics*. Florida: Robert E. Krieger.
- Hall, P. (1979). On the relative stability of large order statistics. In *Mathematical Proceedings of the Cambridge Philosophical Society*, vol. 86, 467–475. Cambridge Univ Press.
- Nordström, K. (2011). Convexity of the inverse and Moore–Penrose inverse. *Linear Algebra and its Applications* **434**, 6, 1489–1512.
