# Supplementary material
Source: publisher figshare collection journal article supplement (https://tandf.figshare.com/articles/dataset/_/5787525)

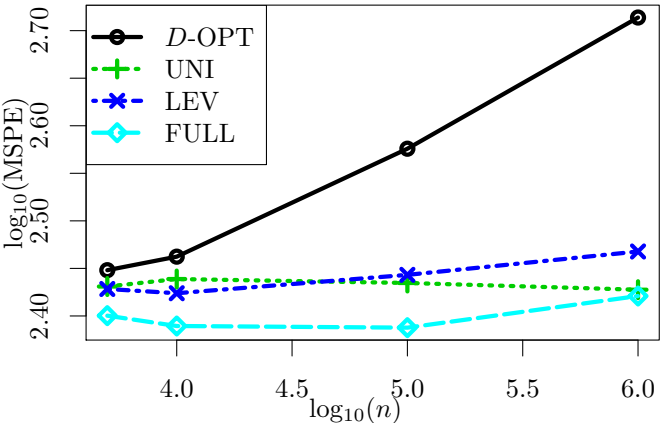

Supplement: Supplementary file 1 [file 1]

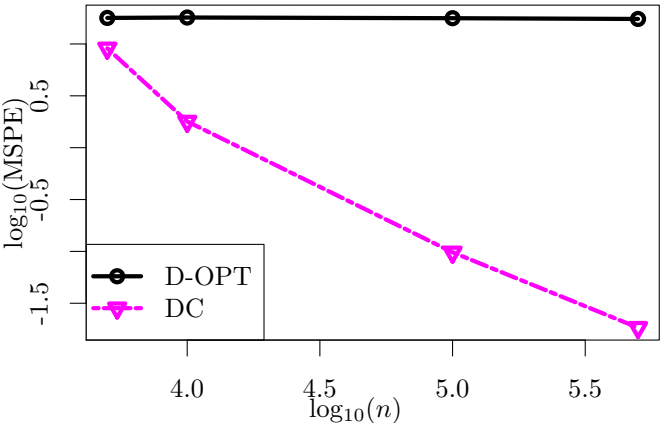

Supplement: Supplementary file 2 [file 1]

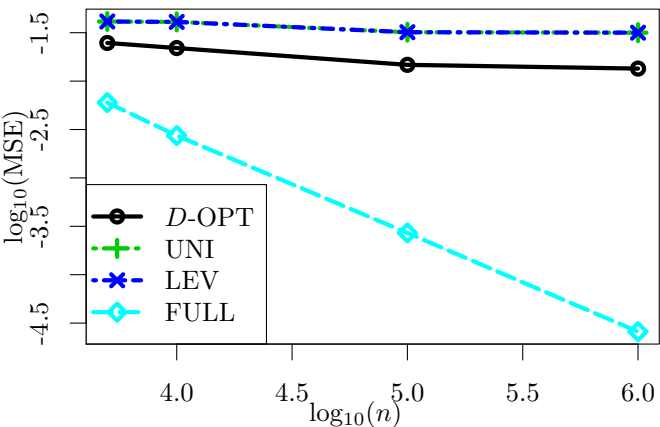

Supplement: Supplementary file 3 [file 1]

$\log_{10}(\text{MSE})$

-0.10  
-0.20

4.0

4.5

5.0

5.5

6.0

$\log_{10}(n)$

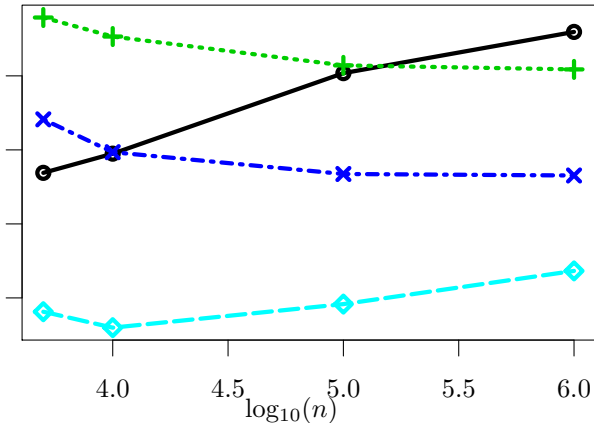

Supplement: Supplementary file 4 [file 1]

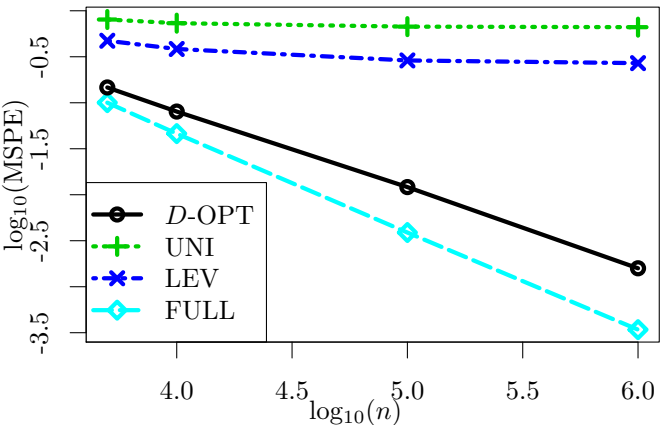

Supplement: Supplementary file 5 [file 1]

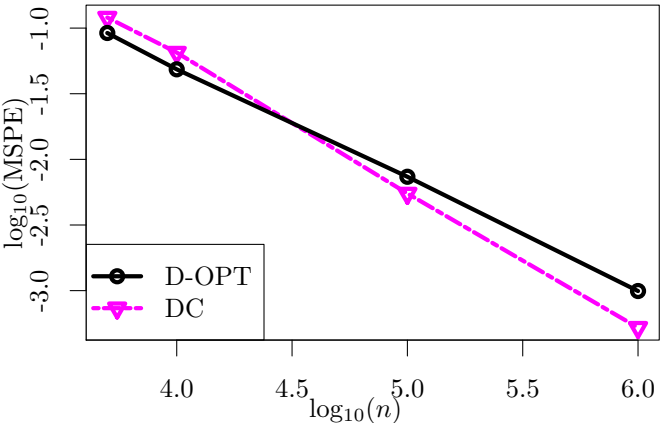

Supplement: Supplementary file 6 [file 1]

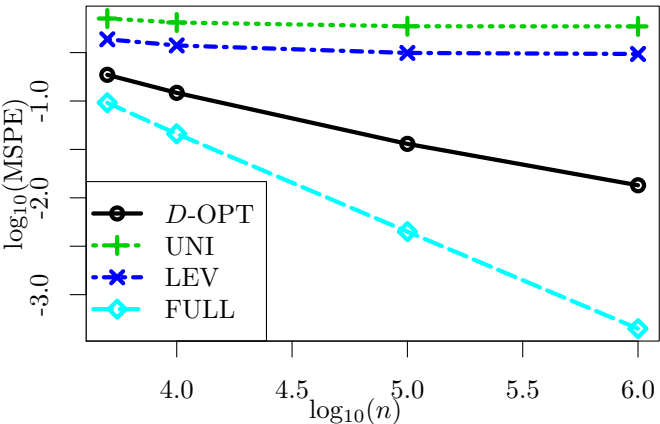

Supplement: Supplementary file 7 [file 1]

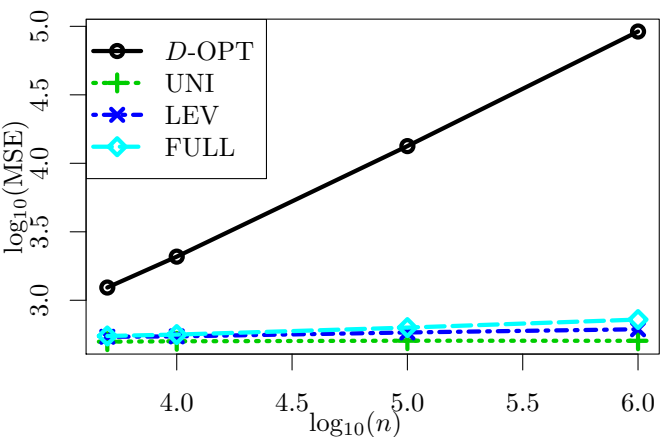

Supplement: Supplementary file 8 [file 1]

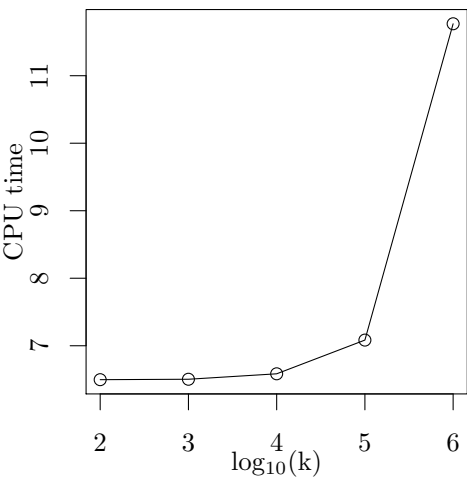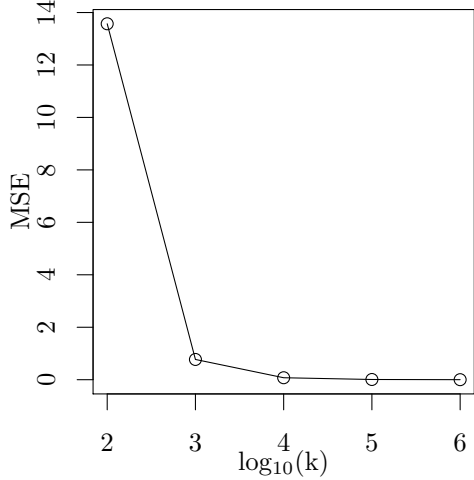

Supplement: Supplementary file 9 [file 1]

$\log_{10}(\text{MSE})$

-1.5

-2.5

-3.5

-4.5

$D\text{-OPT}$   
UNI  
LEV  
FULL

4.0

4.5

5.0

5.5

6.0

$\log_{10}(n)$

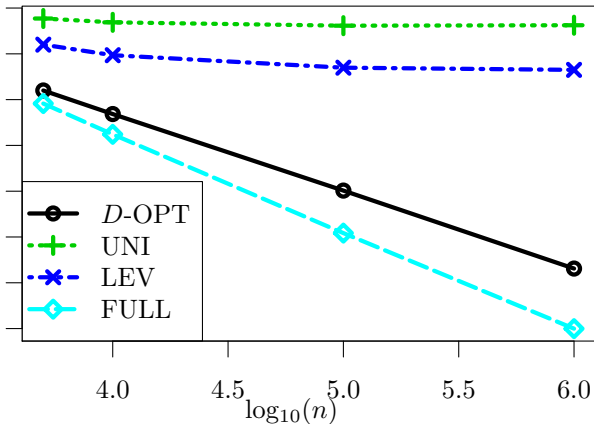

Supplement: Supplementary file 10 [file 1]

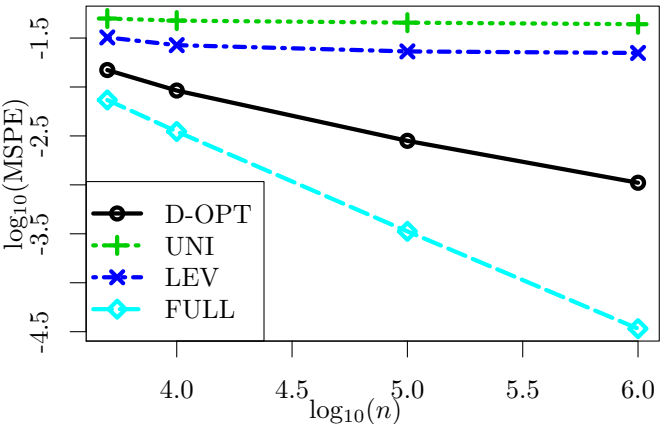

Supplement: Supplementary file 11 [file 1]

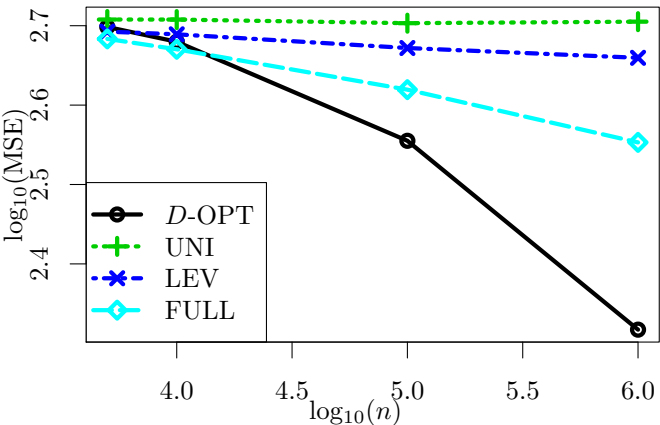

Supplement: Supplementary file 12 [file 1]

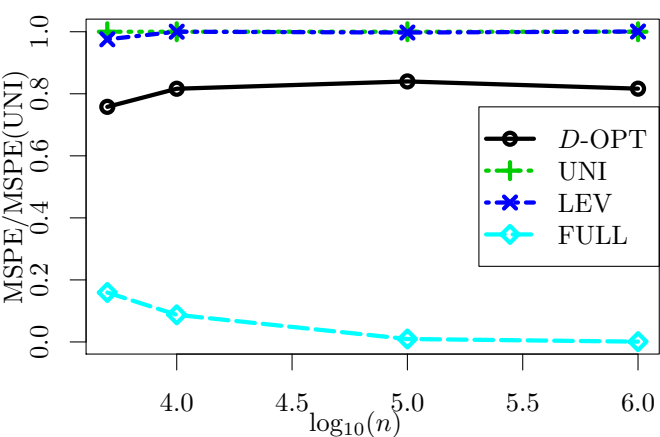

Supplement: Supplementary file 13 [file 1]

$\log_{10}(\text{MSE})$ 

-1.5

-2.5

-3.5

-4.5

$\bullet$ —  $D\text{-OPT}$   
 $\cdot$ +  $\text{UNI}$   
 $\cdot$ \*  $\text{LEV}$   
 $\cdot$  $\diamond$   $\text{FULL}$

4.0

4.5

5.0

5.5

6.0

 $\log_{10}(n)$ 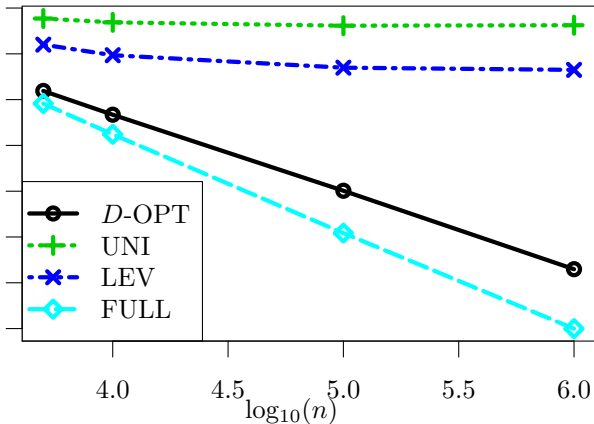

Supplement: Supplementary file 14 [file 1]

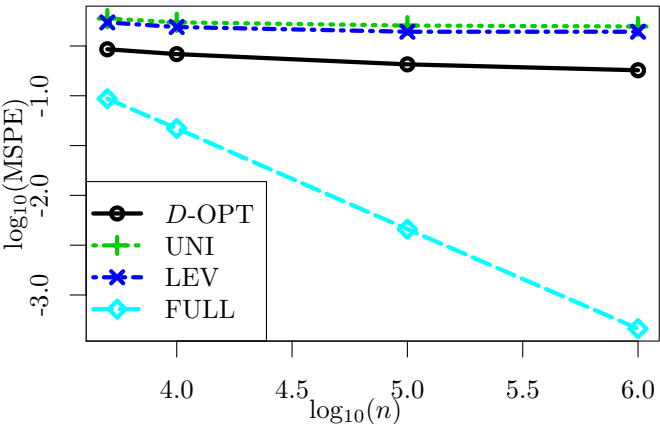

Supplement: Supplementary file 15 [file 1]

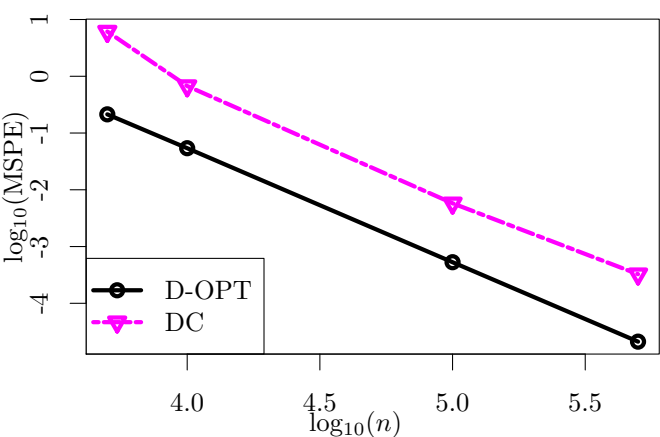

Supplement: Supplementary file 17 [file 1]

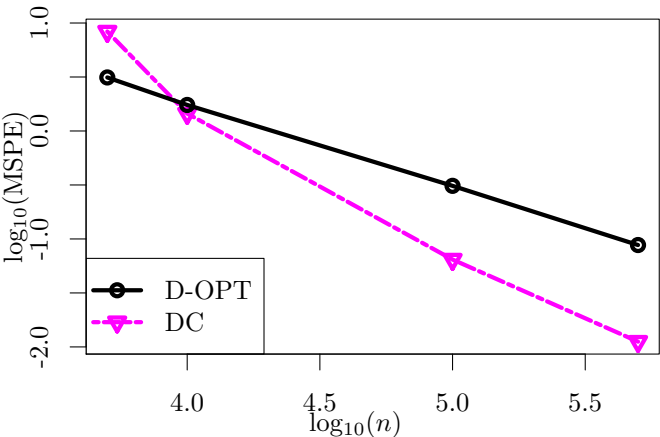

Supplement: Supplementary file 18 [file 1]

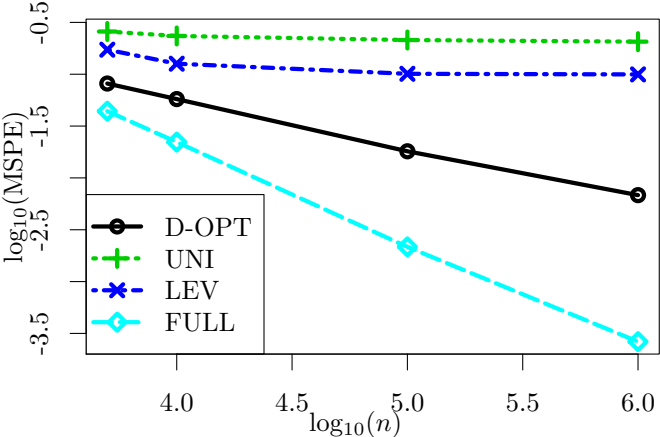

Supplement: Supplementary file 19 [file 1]

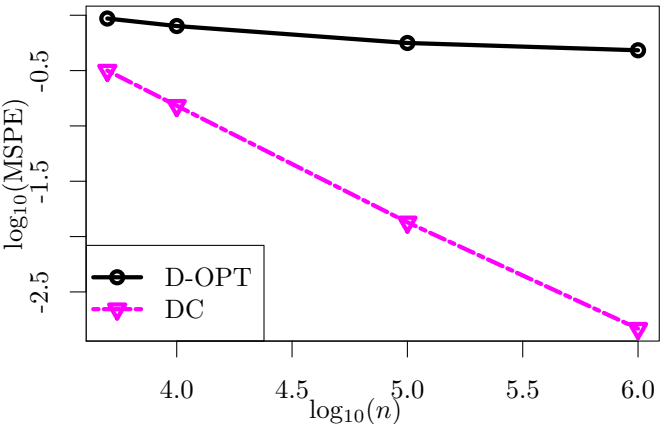

Supplement: Supplementary file 20 [file 1]

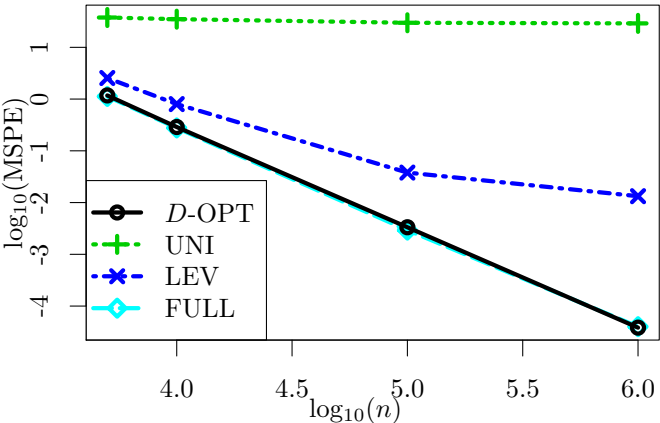

Supplement: Supplementary file 21 [file 1]

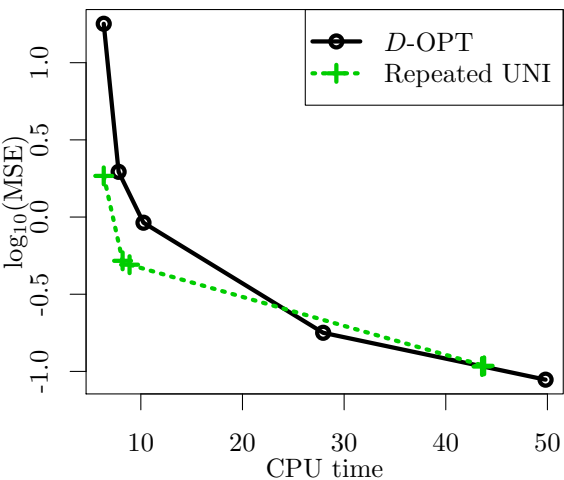

Supplement: Supplementary file 22 [file 1]

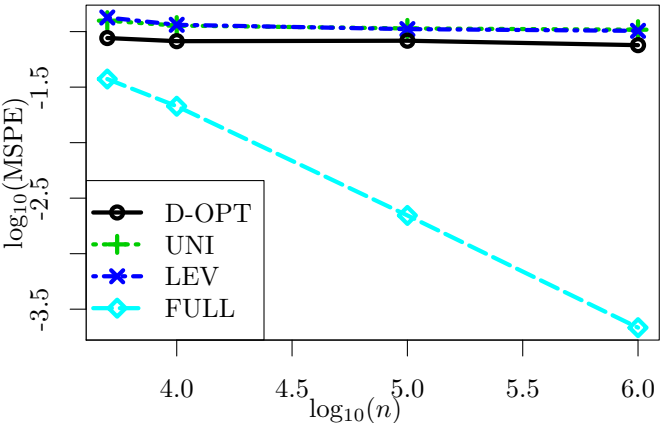

Supplement: Supplementary file 23 [file 1]

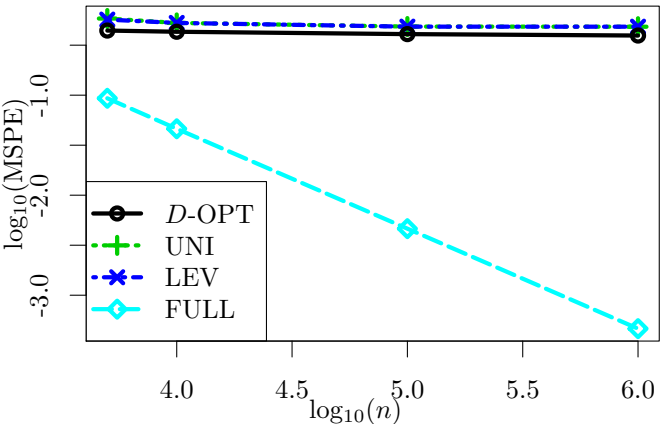

Supplement: Supplementary file 24 [file 1]

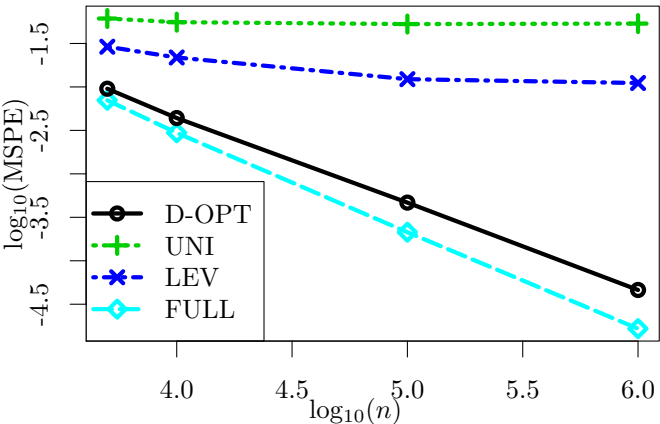

Supplement: Supplementary file 25 [file 1]

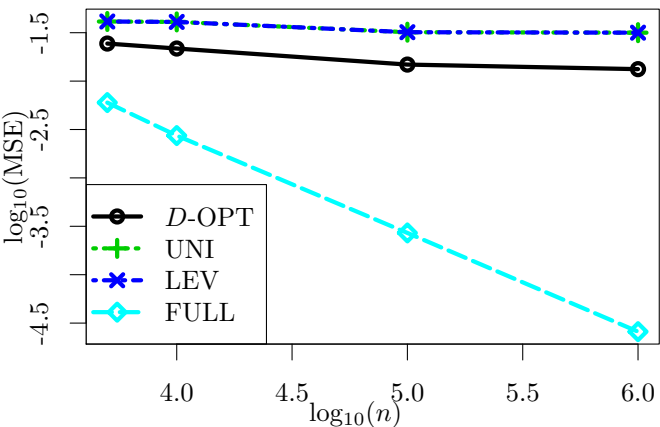

Supplement: Supplementary file 26 [file 1]

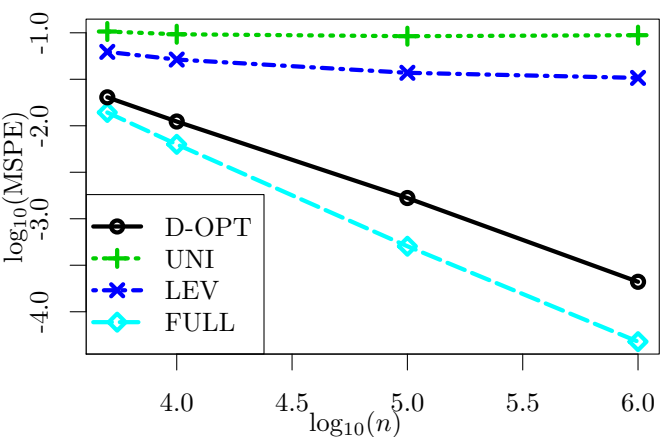

Supplement: Supplementary file 27 [file 1]

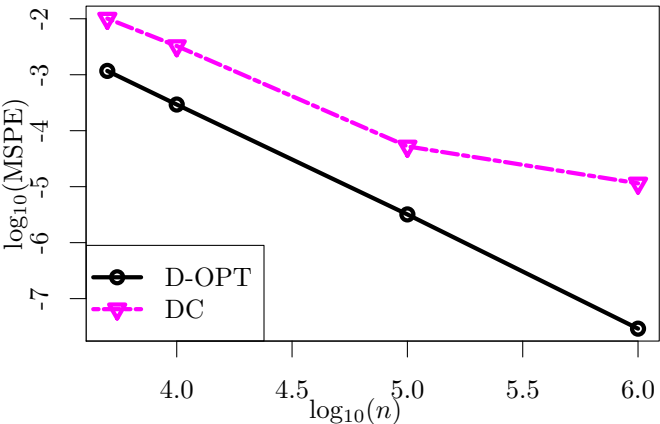

Supplement: Supplementary file 28 [file 1]

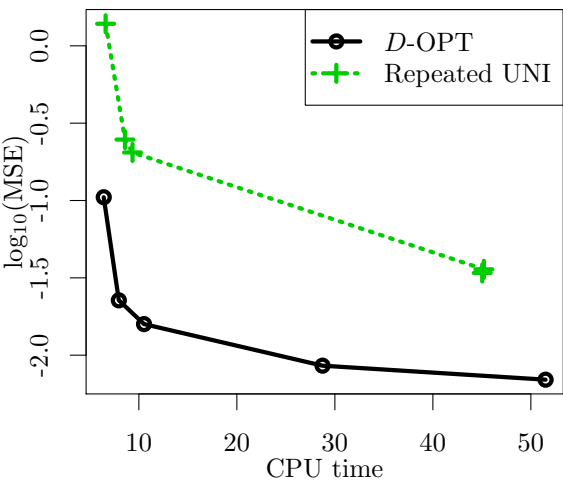

Supplement: Supplementary file 29 [file 1]

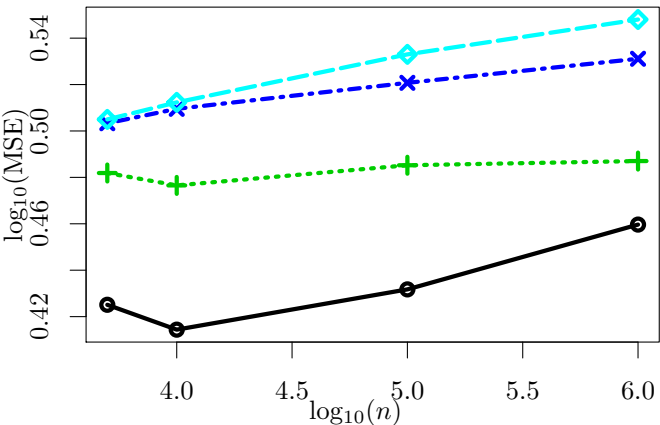

Supplement: Supplementary file 30 [file 1]

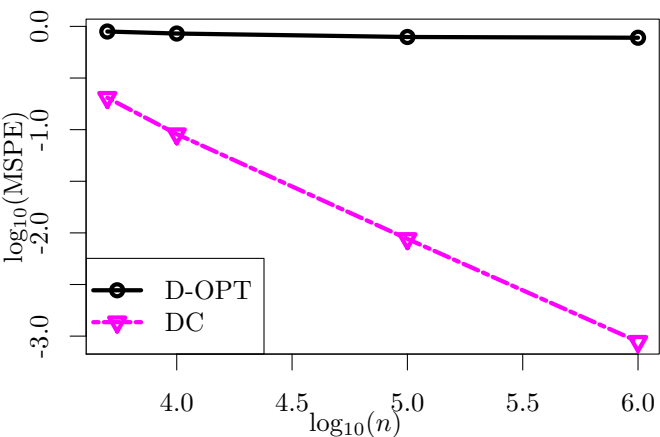

Supplement: Supplementary file 31 [file 1]

Time

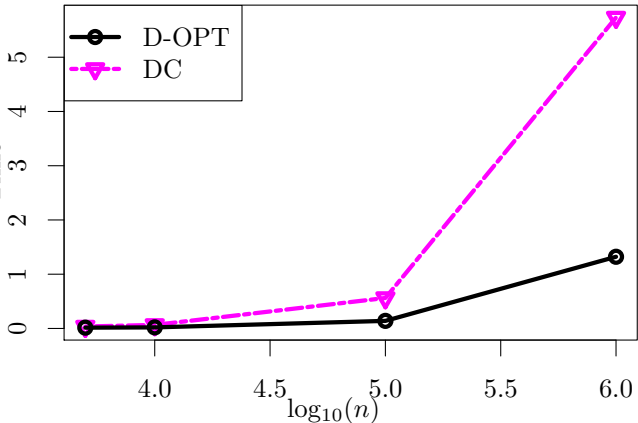

Supplement: Supplementary file 32 [file 1]

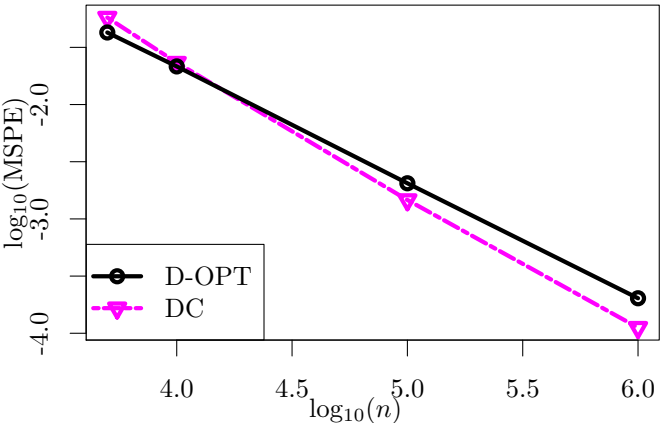

Supplement: Supplementary file 33 [file 1]

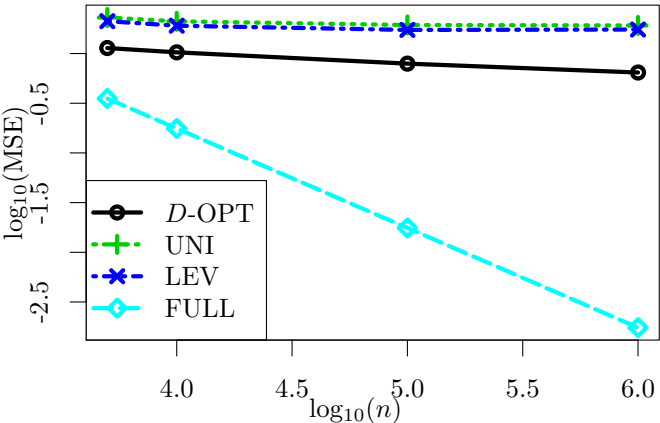

Supplement: Supplementary file 34 [file 1]

$\log_{10}(\text{MSE})$

-2.0

-3.0

-4.0

-5.0

4.0

4.5

5.0

5.5

6.0

$\log_{10}(n)$

$\bullet$ —  $D\text{-OPT}$   
 $\cdot$ +  $\text{UNI}$   
 $\cdot$ \*  $\text{LEV}$   
 $\cdot$  $\diamond$   $\text{FULL}$

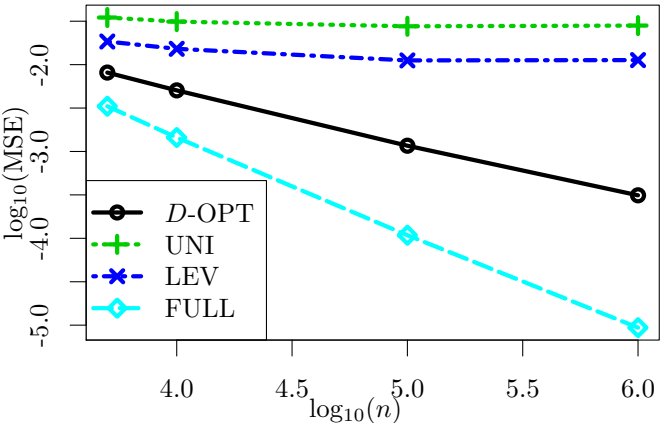

Supplement: Supplementary file 35 [file 1]

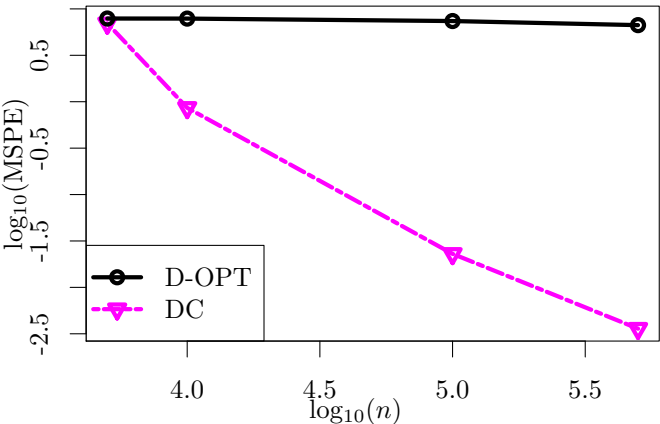

Supplement: Supplementary file 36 [file 1]

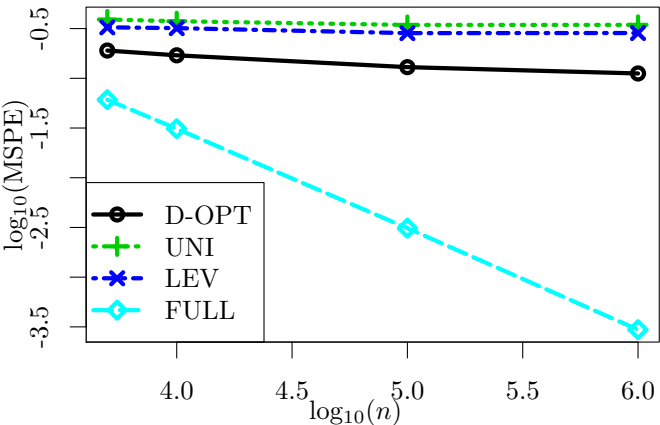

Supplement: Supplementary file 37 [file 1]

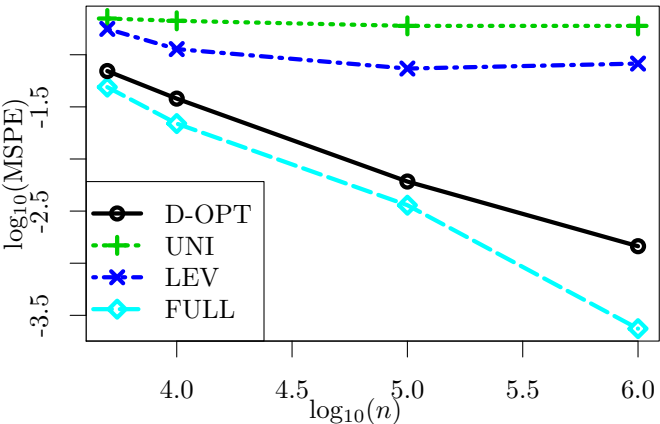

Supplement: Supplementary file 38 [file 1]

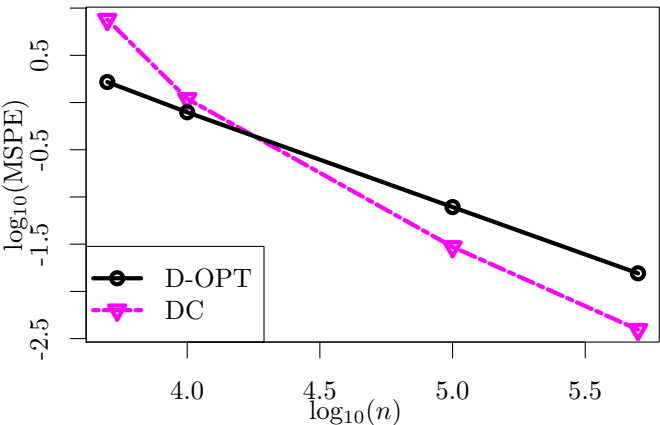

Supplement: Supplementary file 39 [file 1]

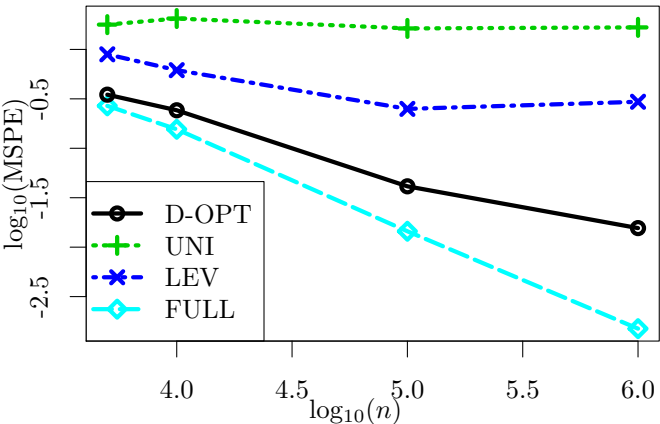

Supplement: Supplementary file 40 [file 1]

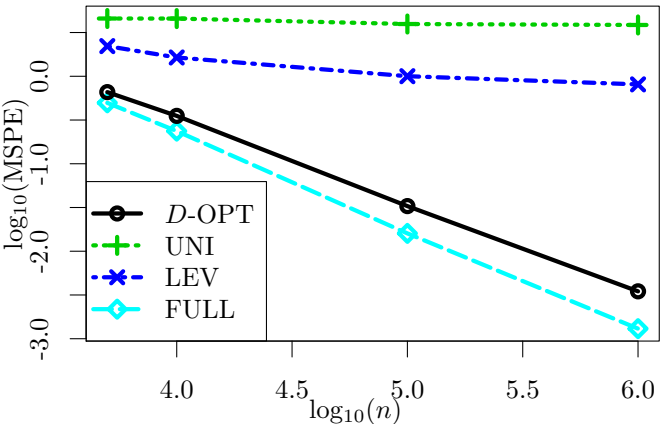

Supplement: Supplementary file 41 [file 1]

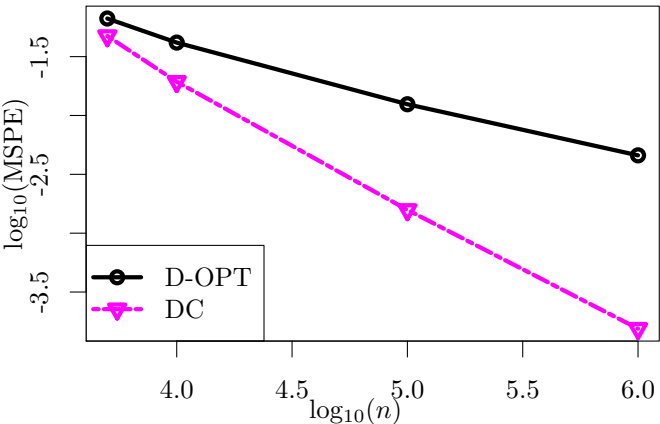

Supplement: Supplementary file 42 [file 1]

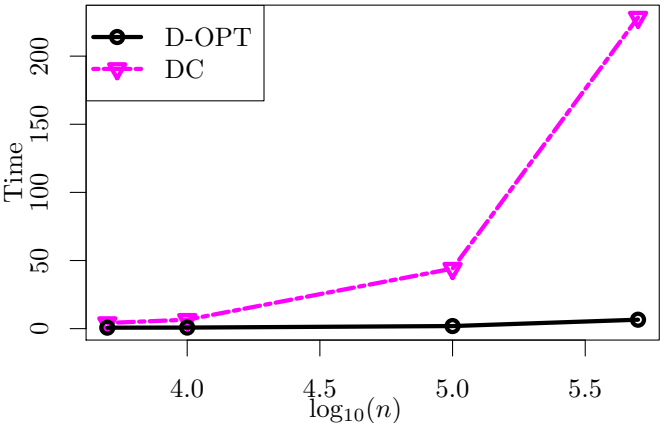

Supplement: Supplementary file 43 [file 1]

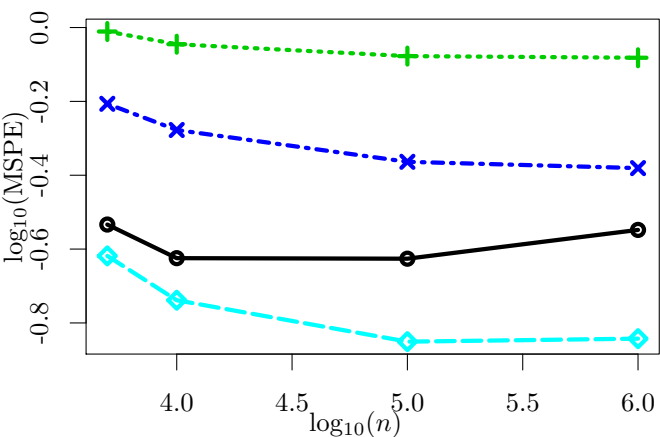

Supplement: Supplementary file 44 [file 1]

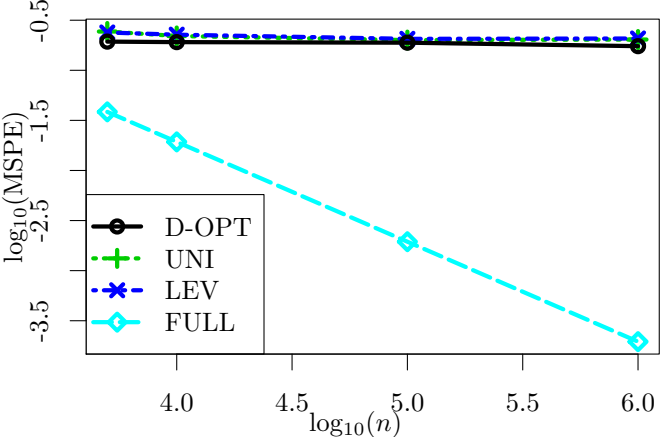

Supplement: Supplementary file 45 [file 1]

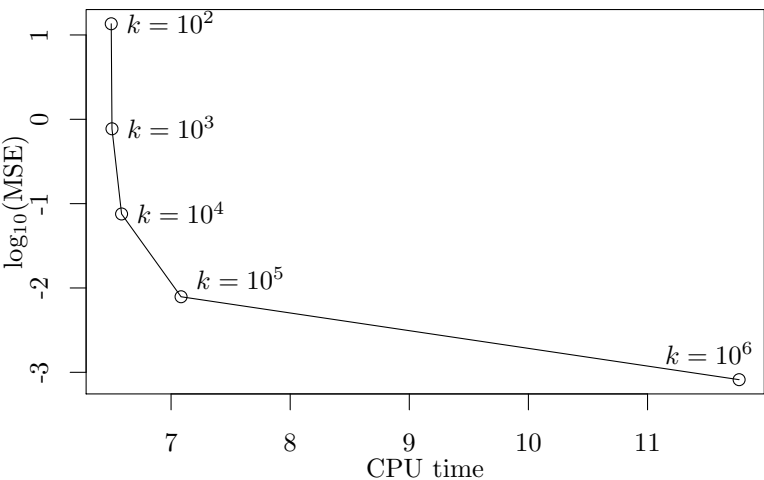

Supplement: Supplementary file 46 [file 1]
